# Supplementary material for: [3 + 2] versus [2 + 2] Addition: A Density Functional Theory Study on the Mechanistic Aspects of Transition Metal-Assisted Formation of 1,2-Dinitrosoalkanes
Source: Hindawi journal article supplement (doi:10.1155/2016/4538696), 2016-01-01
Supplement: f1 [file 4538696.f1.docx]

# [3 + 2] Versus [2 + 2] Addition: A Density Functional Theory Study on the Mechanistic Aspects of Transition-Metal-Assisted Formation of 1,2-Dinitrosoalkanes

Ernest Opoku, Richard Tia* and Evans Adei

Theoretical and Computational Chemistry Laboratory, Department of Chemistry, Kwame Nkrumah University of Science and Technology, Kumasi, Ghana

ernopoku@gmail.com, [richtiagh@yahoo.com](mailto:richtiagh@yahoo.com), [eadei@yahoo.com](mailto:eadei@yahoo.com)

**Figure S1:** Free energy profile of the [3 + 2] and [2 + 2] addition reaction between CpCo(NO)2 and propene. Relative energies in kcalmol-1. All bond distances are measured in Å.

**Figure S2:** Free energy profile of the [3 + 2] and [2 + 2] addition reaction between CpRh(NO)2 and propene. Relative energies in kcalmol-1. All bond distances are measured in Å.

**Figure S3:** Free energy profile of the [3 + 2] and [2 + 2] addition reaction between CpIr(NO)2 and propene. Relative energies in kcalmol-1. All bond distances are measured in Å.

**Figure S4:** Free energy profile of the [3 + 2] and [2 + 2] addition reaction between CpCo(NO)2 and transbutene. Relative energies in kcalmol-1. All bond distances are measured in Å.

**Figure S5:** Free energy profile of the [3 + 2] and [2 + 2] addition reaction between CpRh(NO)2 and transbutene. Relative energies in kcalmol-1. All bond distances are measured in Å.

**Figure S6:** Free energy profile of the [3 + 2] and [2 + 2] addition reaction between CpIr(NO)2 and transbutene. Relative energies in kcalmol-1. All bond distances are measured in Å.

**Figure S7:** Free energy profile of the [3 + 2] and [2 + 2] addition reaction between CpCo(NO)2 and vinyl fluoride. Relative energies in kcalmol-1. All bond distances are measured in Å.

**Figure S8:** Free energy profile of the [3 + 2] and [2 + 2] addition reaction between CpRh(NO)2 and vinyl fluoride. Relative energies in kcalmol-1. All bond distances are measured in Å.

**Figure S9:** Free energy profile of the [3 + 2] and [2 + 2] addition reaction between CpIr(NO)2 and vinyl fluoride. Relative energies in kcalmol-1. All bond distances are measured in Å.

##

**Figure S10:** Free energy profile of the [3 + 2] and [2 + 2] addition reaction between CpCo(NO)2 and ethenol. Relative energies in kcalmol-1. All bond distances are measured in Å.

**Figure S11:** Free energy profile of the [3 + 2] and [2 + 2] addition reaction between CpRh(NO)2 and ethenol. Relative energies in kcalmol-1. All bond distances are measured in Å.

##

**Figure S12:** Free energy profile of the [3 + 2] and [2 + 2] addition reaction between CpIr(NO)2 and ethenol. Relative energies in kcalmol-1. All bond distances are measured in Å.

**Figure S13:** Free energy profile of the [3 + 2] and [2 + 2] addition reaction between CpCo(NO)2 and aminoethene. Relative energies in kcalmol-1. All bond distances are measured in Å.

**Figure S14:** Free energy profile of the [3 + 2] and [2 + 2] addition reaction between CpRh(NO)2 and aminoethene. Relative energies in kcalmol-1. All bond distances are measured in Å.

**Figure S15:** Free energy profile of the [3 + 2] and [2 + 2] addition reaction between CpIr(NO)2 and aminoethene. Relative energies in kcalmol-1. All bond distances are measured in Å.

**Figure S16:** Free energy profile of the [3 + 2] and [2 + 2] addition reaction between CpCo(NO)2 and acrylonitrile. Relative energies in kcalmol-1. All bond distances are measured in Å.

**Figure S17:** Free energy profile of the [3 + 2] and [2 + 2] addition reaction between CpRh(NO)2 and acrylonitrile. Relative energies in kcalmol-1. All bond distances are measured in Å.

**Figure S18:** Free energy profile of the [3 + 2] and [2 + 2] addition reaction between CpIr(NO)2 and acrylonitrile. Relative energies in kcalmol-1. All bond distances are measured in Å.

**Figure S19:** Free energy profile of the [3 + 2] and [2 + 2] addition reaction between CpCo(NO)2 and 3,3,3-trifluoro-1-propene. Relative energies in kcalmol-1. All bond distances are measured in Å.

**Figure S20:** Free energy profile of the [3 + 2] and [2 + 2] addition reaction between CpRh(NO)2 and 3,3,3-trifluoro-1-propene. Relative energies in kcalmol-1. All bond distances are measured in Å.

**Figure S21:** Free energy profile of the [3 + 2] and [2 + 2] addition reaction between CpIr(NO)2 and 3,3,3-trifluoro-1-propene. Relative energies in kcalmol-1. All bond distances are measured in Å.

**Figure S22:** Free energy profile of the [3 + 2] and [2 + 2] addition reaction between CpCo(NO)2 and 2,3-dimethyl-2-butene. Relative energies in kcalmol-1. All bond distances are measured in Å.

**Figure S23:** Free energy profile of the [3 + 2] and [2 + 2] addition reaction between CpRh(NO)2 and 2,3-dimethyl-2-butene. Relative energies in kcalmol-1. All bond distances are measured in Å.

**Figure S24:** Free energy profile of the [3 + 2] and [2 + 2] addition reaction between CpIr(NO)2 and 2,3-dimethyl-2-butene. Relative energies in kcalmol-1. All bond distances are measured in Å.

**Figure S25:** Free energy profile of the [3 + 2] and [2 + 2] addition reaction between CpCo(NO)2 and cyclobutene. Relative energies in kcalmol-1. All bond distances are measured in Å.

**Figure S26:** Free energy profile of the [3 + 2] and [2 + 2] addition reaction between CpRh(NO)2 and cyclobutene. Relative energies in kcalmol-1. All bond distances are measured in Å.

**Figure S27:** Free energy profile of the [3 + 2] and [2 + 2] addition reaction between CpIr(NO)2 and cyclobutene. Relative energies in kcalmol-1. All bond distances are measured in Å.

**Figure S28:** Free energy profile of the [3 + 2] and [2 + 2] addition reaction between CpCo(NO)2 andcyclopentene. Relative energies in kcalmol-1. All bond distances are measured in Å.

**Figure S29:** Free energy profile of the [3 + 2] and [2 + 2] addition reaction between CpRh(NO)2 and cyclopentene. Relative energies in kcalmol-1. All bond distances are measured in Å.

**Figure S30:** Free energy profile of the [3 + 2] and [2 + 2] addition reaction between CpIr(NO)2 and cyclopentene. Relative energies in kcalmol-1. All bond distances are measured in Å.

**Figure S31:** Free energy profile of the [3 + 2] and [2 + 2] addition reaction between CpCo(NO)2  and 2-cyclohexenone. Relative energies in kcalmol-1. All bond distances are measured in Å.

**Figure S32:** Free energy profile of the [3 + 2] and [2 + 2] addition reaction between CpRh(NO)2  and 2-cyclohexenone. Relative energies in kcalmol-1. All bond distances are measured in Å.

**Figure S33:** Free energy profile of the [3 + 2] and [2 + 2] addition reaction between CpIr(NO)2  and 2-cyclohexenone. Relative energies in kcalmol-1. All bond distances are measured in Å.
